- [2] Losanoff JE, Richman BW, Jones JW. Disruption and infection of median sternotomy: a comprehensive review. *Eur J Cardiothorac Surg* 2002;21:831–9.
- [3] El Oakley RM, Wright JE. Postoperative mediastinitis: classification and management. *Ann Thorac Surg* 1996;61:1030–6.
- [4] Gaudreau G, Costache V, Houde C, Cloutier D, Montalin L, Voisine P *et al.* Recurrent sternal infection following treatment with negative pressure wound therapy and titanium transverse plate fixation. *Eur J Cardiothorac Surg* 2010;37:888–92.
- [5] Voss B, Bauernschmitt R, Will A, Krane M, Kröss R, Brockmann G *et al.* Sternal reconstruction with titanium plates in complicated sternal dehiscence. *Eur J Cardiothorac Surg* 2008;34:139–45.
- [6] Tarzia V, Carrozzini M, Bortolussi G, Buratto E, Bejko J, Comisso M *et al.* Impact of vacuum-assisted closure therapy on outcomes of sternal wound dehiscence. *Interact CardioVasc Thorac Surg* 2014;19:70–5.
- [7] Horan TC, Andrus M, Dudeck MA. CDC/NHSN surveillance definitive of health care-associated infection and criteria for specific types of infections in the acute care setting. *Am J Infect Control* 2008;36:309–32.
- [8] Simek M, Hajek R, Fluger I, Molitor M, Grulichova J, Langova K *et al.* Superiority of topical negative pressure over closed irrigation therapy of deep sternal wound infection in cardiac surgery. *J Cardiovasc Surg (Torino)* 2012;53:113–20.
- [9] Collection of Laws of The Czech Republic. Act No. 296/2008 Collegium on Human Tissues and Cells Prague 2008.
- [10] European Association of Tissue Banks. General Standards for Tissue Banking, ÖBIG-Transplant, Vienna, 1995.
- [11] Copeland M, Senkowski C, Ulcickas M, Mendelson M, Griep RB. Breast size as a risk factor for sternal wound complications following cardiac surgery. *Arch Surg* 1994;129:757–9.
- [12] Loop FD, Lytle BW, Cosgrove DM, Mahfood S, Mc Henry MC, Goormastic M *et al.* Maxwell Chamberlain memorial paper: sternal wound complications after isolated coronary artery bypass grafting: early and late mortality, morbidity and cost of care. *Ann Surg* 1990;49:179–87.
- [13] Song DH, Wu LC, Lohman RF, Gottlieb LJ, Franczyk M. Vacuum assisted closure for the treatment of sternal wounds: the bridge between debridement and definitive closure. *Plast Reconstr Surg* 2003;111:92–7.
- [14] Robicsek F, Fokin A, Cook J, Bhatia D. Sternal instability after midline sternotomy. *Thorac Cardiovasc Surg* 2000;48:1–8.
- [15] Wettstein R, Erni D, Berdat P, Rothenfluh D, Banic A. Radical sternectomy and primary musculocutaneous flap reconstruction to control sternal osteitis. *J Thorac Cardiovasc Surg* 2002;123:1185–90.
- [16] Shibata T, Hattori K, Hirai H, Fujii H, Aoyama T, Seuhiro S. Rectus abdominis myocutaneous flap after unsuccessful delayed sternal closure. *Ann Thorac Surg* 2003;76:956–8.
- [17] Lee AB Jr, Schimert G, Shaktin S, Seigel JH. Total excision of the sternum and thoracic pedicle transposition of the greater omentum; useful strategies in managing severe mediastinal infection following open heart surgery. *Surgery* 1976;80:433–6.
- [18] Nahabedian MY, Riley LH, Greene PS, Yang SC, Van der Kolk CA. Sternal stabilization using allograft fibula following cardiac transplantation. *Plast Reconstr Surg* 2001;108:1284–8.
- [19] Chai Y, Zhang G, Shen G. Autogenous rib grafts for reconstruction of sternal defects after partial resection: a new surgical technique. *Plast Reconstr Surg* 2008;121:353–5.
- [20] De Feo M, Carozza A, DellaCorte A, Quarto C, Torella M, De Santo LS *et al.* Achilles tendon for sternal synthesis in the treatment of mediastinitis. *Ann Thorac Surg* 2005;79:359–60.
- [21] Demondion P, Mercier O, Kolb F, Fadel E. Sternal replacement with a custom-made titanium plate after resection of a solitary breast cancer metastasis. *Interact CardioVasc Thorac Surg* 2014;18:145–7.
- [22] Rocco G. Overview on current and future materials for chest wall reconstruction. *Thorac Surg Clin* 2010;20:559–62.
- [23] Marulli G, Hamad AM, Cogliati E, Breda C, Zuin A, Rea F. Allograft sternochondral replacement after resection of large sternal chondrosarcoma. *J Thorac Cardiovasc Surg* 2010;139:e69–70.
- [24] Stella F, Dell'Amore A, Dolci G, Cassanelli N, Caroli G, Zamagni C *et al.* Allogenic sternal transplant after sternectomy for metastasis of ovarian carcinoma. *Ann Thorac Surg* 2012;93:e71–2.
- [25] Dell'Amore A, Cassanelli N, Dolci G, Stella F. An alternative technique for anterior chest wall reconstruction: the sternal allograft transplantation. *Interact CardioVasc Thorac Surg* 2012;15:944–7.

**eComment. Creative solutions in order to treat sternal wound complications in cardiac surgery**

**Author:** Arda Ozyuksel

Department of Cardiovascular Surgery, Medipol University, Istanbul, Turkey

doi: 10.1093/icvts/ivv384

© The Author 2016. Published by Oxford University Press on behalf of the European Association for Cardio-Thoracic Surgery. All rights reserved.

I read with great interest the article by Kalab and colleagues about their successful results with regard to the reconstruction of massive sternum defects following cardiac surgery [1]. They used allogenic bone transplantation in order to substitute tissue loss due to mediastinitis. Mechanical instability of the sternum is an untoward complication with significant morbidity in the field of cardiac surgery. The risk factors for sternal nonunion are broadly classified as preoperative, intraoperative, and postoperative [2]. Preoperative factors are related to the pre-existing factors in the patients, such as diabetes mellitus, obesity, chronic obstructive pulmonary disease, osteoporosis, and radiation to the chest. The intraoperative risk factors for sternal nonunion are mainly associated with technical errors, such as paramedian sternotomy, harvest of bilateral internal thoracic arteries for grafting, and mechanical failure. Postoperatively, prolonged mechanical ventilation, impaired cardiac output and infectious aetiologies are the most important risk factors associated with increased sternal complications. Several methods, devices and substitution material have been reported in literature. The biological substitution material as emphasized by Kalab *et al.* have the major advantage of optimal mechanical properties, biocompatibility, lower risk of infection as compared to synthetic materials and the ability for new tissue formation by osteoprogenitor cells in the allografts.

I would like to emphasize two other simple precautions that we take in such cases, in order to prevent this untoward complication. Our group introduced another easy and reproducible technique [3]. We used two or three fibula allografts, which serve as a safe and durable landing zone for the circumferential sternal wires, which, in fact, mimic the function and manner of the long axis parasternal wires originally described by Robicsek and colleagues. This techniques makes the safe implementation of the stainless steel wires possible, which decreases the cost when compared with titanium bars and other devices. Secondly, we liberally used the reversed omental flap technique, which is easily brought to the mediastinum with a mini-extension of the skin incision towards the abdomen. The omentum flap has indispensable immunogenic and infection-resistant properties, which effectively fills the space created by the massive tissue loss in the anterior mediastinum. In my opinion development of further creative solutions for reconstructing the sternal nonunion will help to decrease the incidence of this untoward complication of cardiac surgery.

**Conflict of interest:** none declared.

**References**

- [1] Kalab M, Karkoska J, Kaminek M, Matejkova E, Slamenikova Z, Klvacsek A *et al.* Reconstruction of massive post-sternotomy defects with allogeneic bone graft: four-year results and experience using the method. *Interact CardioVasc Thorac Surg* 2016;22:305–13.
- [2] El Oakley RM, Wright JE. Postoperative mediastinitis: classification and management. *Ann Thorac Surg* 1996;61:1030–1036.
- [3] Ersoy C, Ozyuksel A, Malkoc M, Kayhan B, Kayan E, Akcevin A *et al.* Fibula allograft sandwich technique for the reconstruction of sternal nonunion after cardiac surgery. *Ann Thorac Surg* 2014;98:e51–53.
